# Supplementary material for: Causes of growing middle-to-upper tropospheric ozone over the northwest Pacific region
Source: Copernicus journal article supplement (doi:10.5194/acp-25-943-2025), 2025-01-27
Supplement: Supplementary file 1 [file acp-25-943-2025-supplement.pdf]

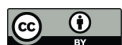

*Supplement of*

## **Causes of growing middle-to-upper tropospheric ozone over the north-west Pacific region**

**Xiaodan Ma et al.**

*Correspondence to:* Jianping Huang ([jianping.huang@noaa.gov](mailto:jianping.huang@noaa.gov))

The copyright of individual parts of the supplement might differ from the article licence.

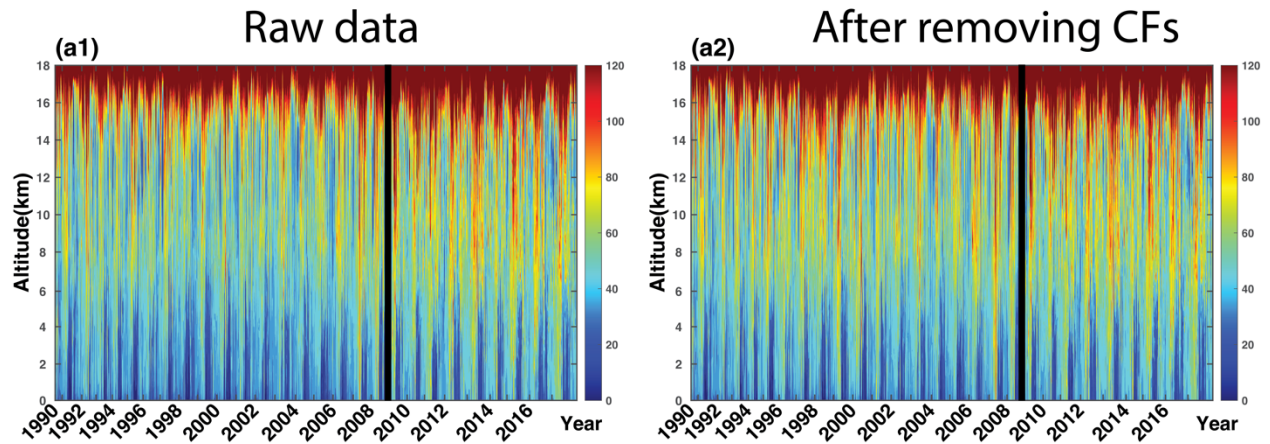

30  
31  
32  
33  
34  
35  
36  
37  
38  
39  
40  
41  
42  
43  
44  
45  
46  
47  
48  
49  
50  
51  
52  
53  
54  
55  
56  
57

Figure S1. All O<sub>3</sub> profile samples were used in the analysis at Naha from (a1) WOUDC and (a2) after removing CFs. Black lines indicate the transition time from the CI to ECC ozonesonde at the Japanese stations around 2009.

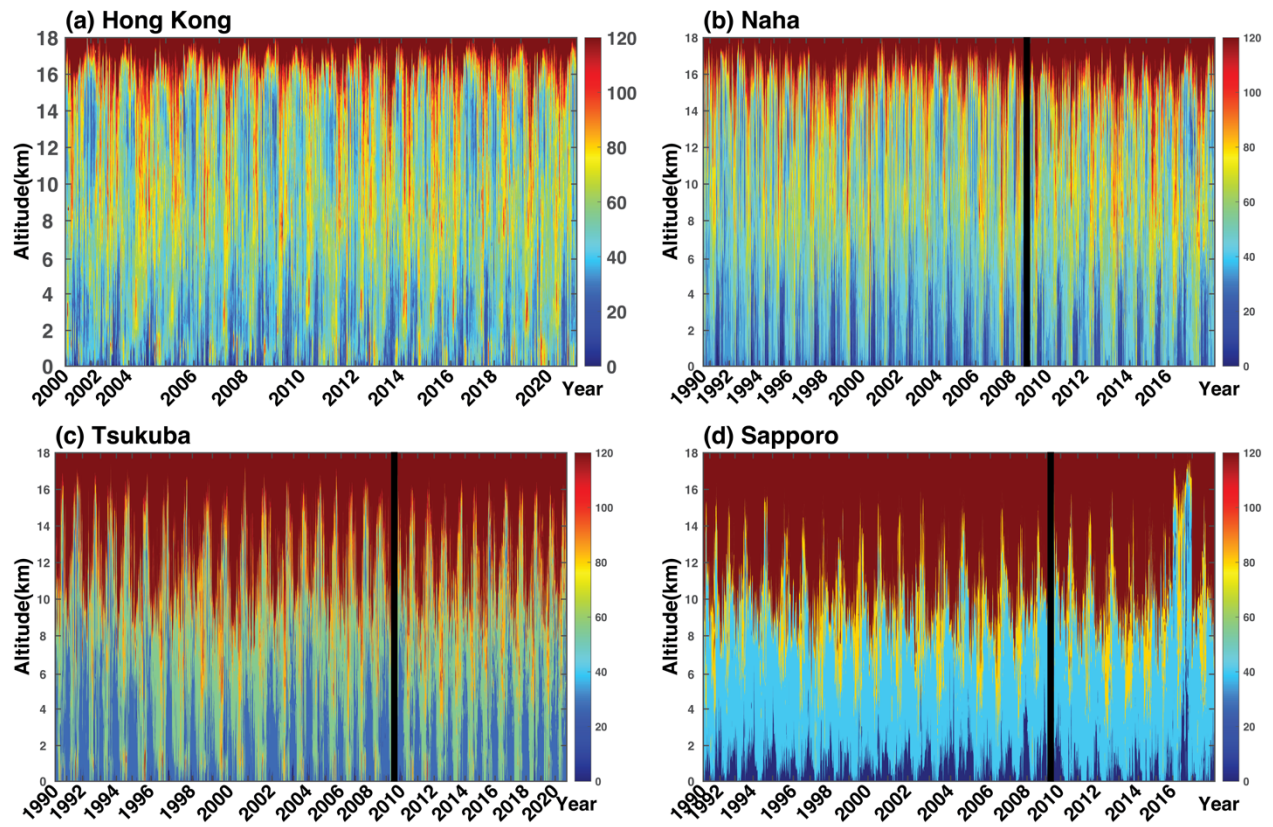

59

60 Figure S2 All O<sub>3</sub> profile samples used in the analysis at (a) Hong Kong, (b) Naha, (c) Tsukuba, and (d) Sapporo. Black lines

61 indicate the transition time from CI to ECC ozonesonde at the Japanese stations around 2009.

62

63

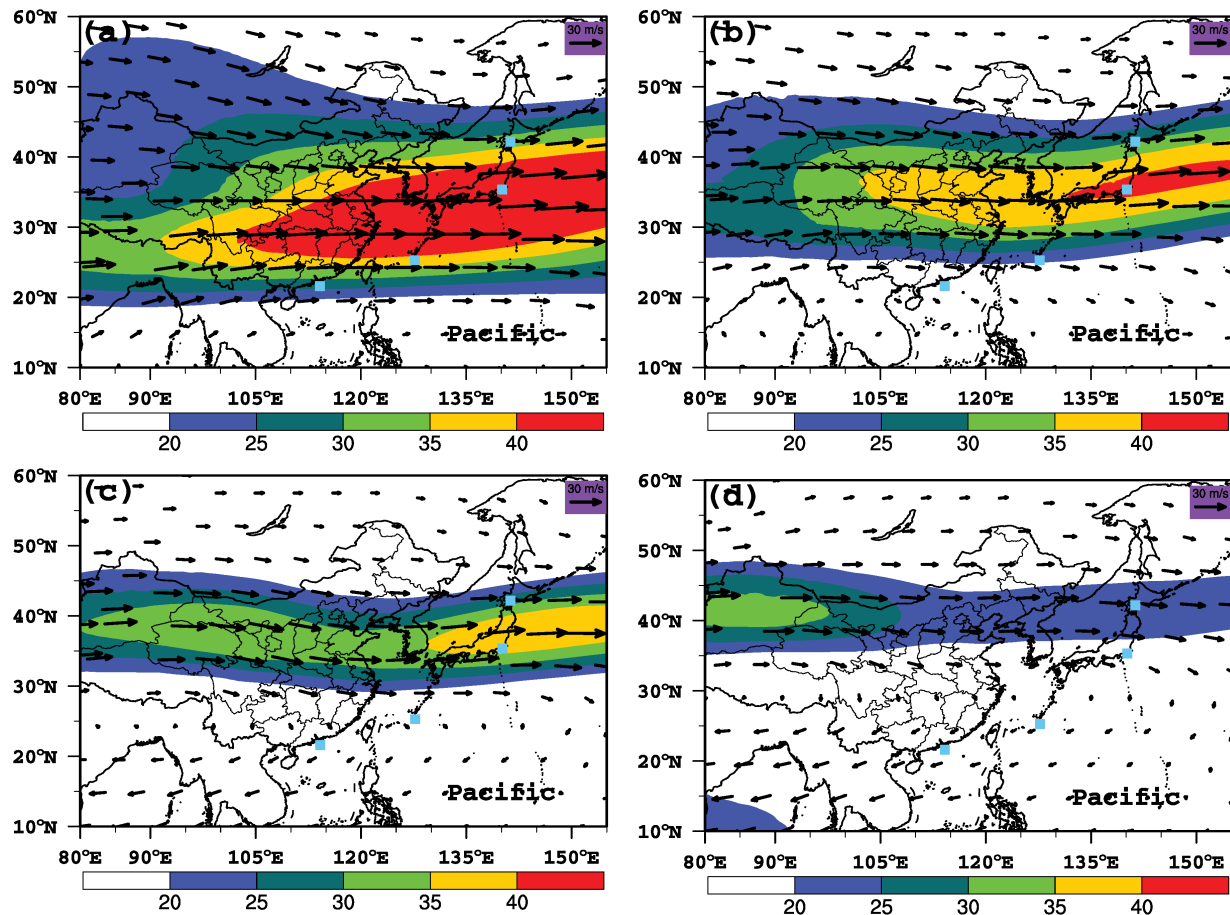

64

65 Figure S3. The wind field (vector) and wind speed (color shades) retrieved from ERA5 (the fifth generation ECMWF  
 66 reanalysis) at 200hPa in (a) April, (b) May, (c) June, and (d) July averaged over 1990-2020. Four O<sub>3</sub>-sounding sites are  
 67 indicated in the blue squares.

68

69

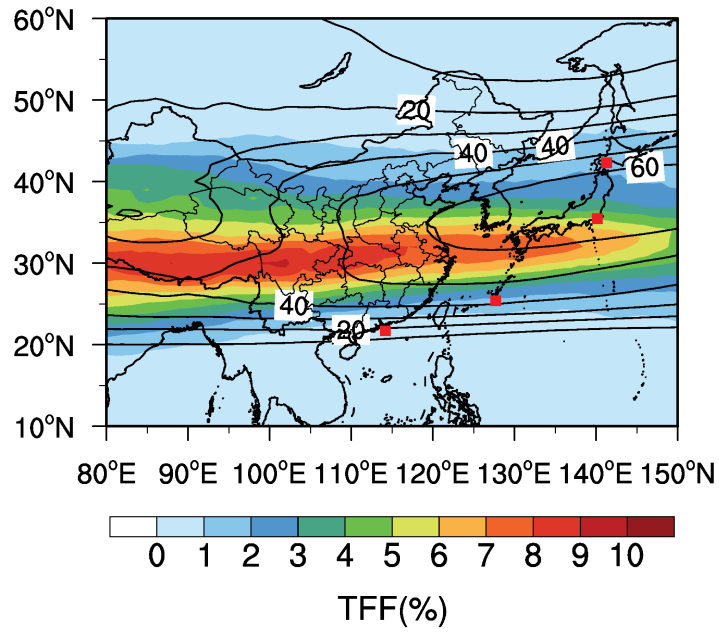

70

71

**Figure S4 Climatological distribution of tropopause folding frequency (shaded color) and jet frequency (contour lines, units: %) during 2000-2018, products provided by ETH Zurich. Four O3-sounding sites are indicated with the red**

72

**squares.**

73

74

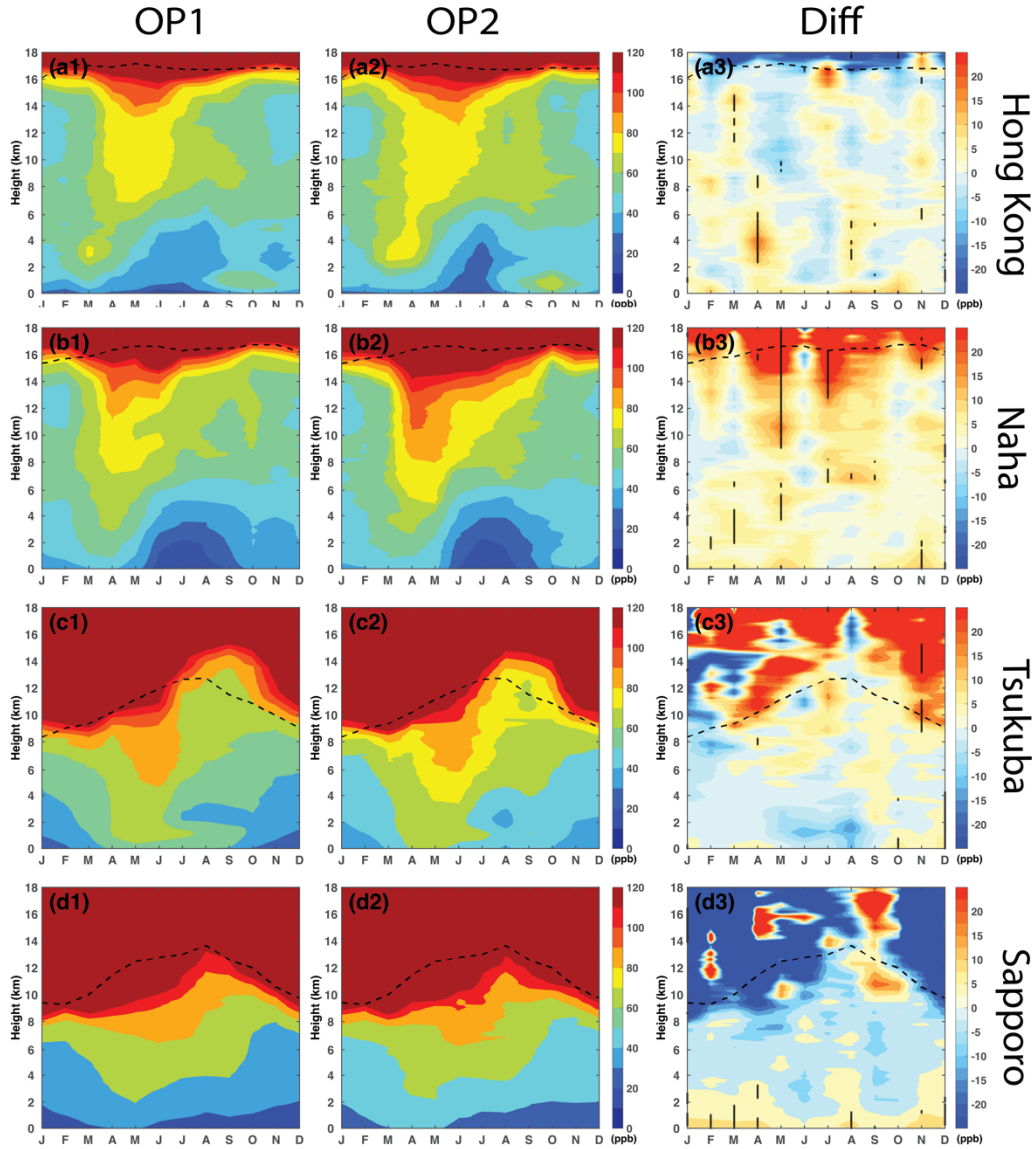

75

76 Figure S5. Monthly evolution of the vertical distribution of mean O<sub>3</sub> in the first overlapping period (OP1: 2000-2008), the  
 77 last overlapping period (OP2: 2009-2017), and the difference between OP2 and OP1 of O<sub>3</sub> at four observation sites (a1-a3)  
 78 Hong Kong, (b1-b3) Naha, (c1-c3) Tsukuba and (d1-d3) Sapporo. Black dash lines indicate tropopause height. Dots in the  
 79 i-l represent the layer with statistically significant changes according to a paired two-sided t-test ( $p < 0.05$ ).

80

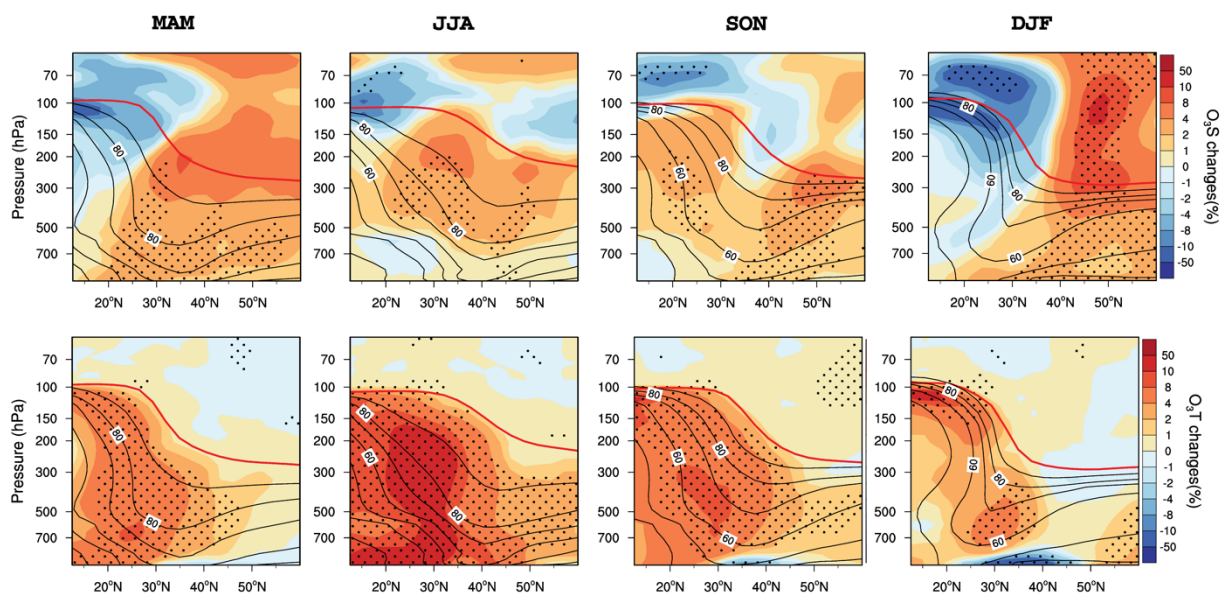

81  
 82 **Figure S6. Latitude-pressure cross sections of difference of  $O_3S$ , and  $O_3T$  relative to climatological  $O_3$  (%) between the**  
 83 **2010s and 1990s along the Northwest Pacific region (zonal mean over  $110^\circ E$  to  $150^\circ E$ ) in four seasons. Black lines indicate**  
 84 **the climatological distribution of  $O_3S$ , and  $O_3T$ , respectively. Red solid lines denote the tropopause height. Dots represent**  
 85 **the layer with statistically significant changes according to a paired two-sided t-test ( $p < 0.05$ ).**  
 86  
 87  
 88  
 89

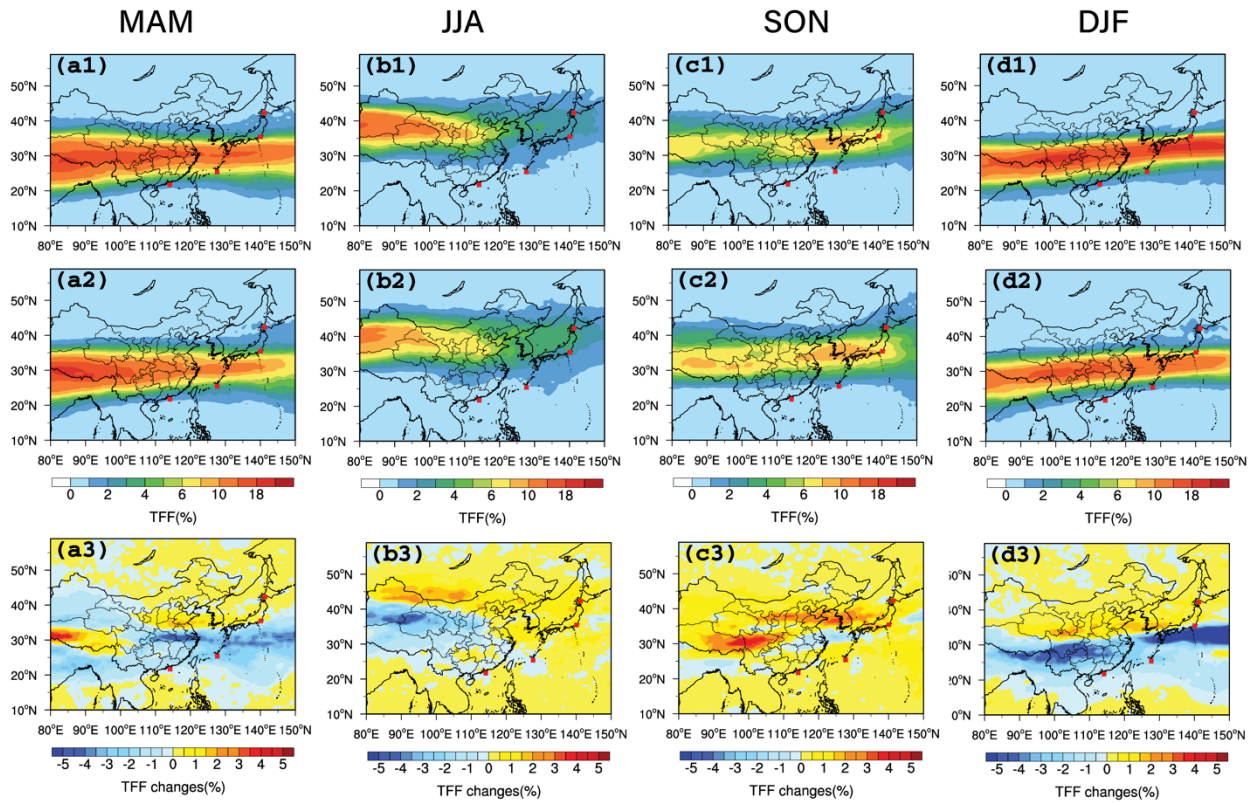

90

91 **Figure S7. Distribution of tropopause folding frequency, a product provided by ETH Zurich, during the 1990s (a1-d1),**  
 92 **2010s (a2-d2) and its changes (a3-d3) at (a) spring, (b) summer, (c) autumn and (d) winter.**

93

94

95
